# Supplementary material for: Biomimetic cytomembrane-coated ZIF-8-loaded DMDD nanoparticle and sonodynamic co-therapy for cancer
Source: PubMed Central journal article supplement — Ann Transl Med. 2022 Sep;10(18):971. doi: 10.21037/atm-22-3646 (PMC9577741; doi:10.21037/atm-22-3646), 2022-09
Supplement: atm-10-18-971-dss.pdf [file atm-10-18-971-dss.pdf]

## Data Sharing Statement

|                     |                                                                                                                                                     |                                                                                                      |
|---------------------|-----------------------------------------------------------------------------------------------------------------------------------------------------|------------------------------------------------------------------------------------------------------|
| <b>Article Info</b> | <a href="https://dx.doi.org/10.21037/atm-22-3646">https://dx.doi.org/10.21037/atm-22-3646</a>                                                       |                                                                                                      |
| <b>Item</b>         | <b>Question</b>                                                                                                                                     | <b>Authors' Response<br/>(place "-" if not applicable)</b>                                           |
| 1                   | Would you like to share data collected for your study to others?                                                                                    | Yes.                                                                                                 |
| 2                   | If not, would you like to share the reason for your decision?                                                                                       | -                                                                                                    |
| 3                   | What data in particular will be shared?                                                                                                             | The study protocol will be shared.                                                                   |
| 4                   | Any other documents will be shared? Such as study protocol, statistical analysis plan, informed consent form, clinical study report, analytic code. | -                                                                                                    |
| 5                   | When will data availability begin?                                                                                                                  | From the publication date.                                                                           |
| 6                   | When will data availability end?                                                                                                                    | One year within the publication date, since the technique or survival data may be updated over time. |
| 7                   | To whom will you share the data?                                                                                                                    | Someone who are interested in our study.                                                             |
| 8                   | For what type of analysis or purpose?                                                                                                               | Basic experiment study.                                                                              |
| 9                   | How or where can the data/documents be obtained?                                                                                                    | Email to <a href="mailto:zhaoshuqi950717@hotmail.com">zhaoshuqi950717@hotmail.com</a>                |
| 10                  | Any other restrictions?                                                                                                                             | -                                                                                                    |
